# Supplementary material
Source: PubMed Central journal article supplement (PMC3872998)

### Supplementary Figure 1. Comparison of WT-RNA-seq and microarray gene expression.

(A) The expression correlation between the two platforms in a representative sample. The average Spearman's rank ( $R_s$ ) across multiple samples =  $0.732 \pm 0.04$ .

(B) In the RNA-seq expression analysis, we identified 356 genes as differentially expressed genes in the 5-group comparison (single-factor ANOVA). Using the same analysis, 78% of these genes showed significant expression changes (raw  $P < 0.05$ ) with the same direction (tumor vs. normal) on a microarray dataset of 83 samples. If the same number of genes were randomly chosen, only 17% would be expected ( $P < 1 \times 10^{-4}$ ). The figure was generated based on 10,000 random samples; blue arrow indicates the observed number.

(A)

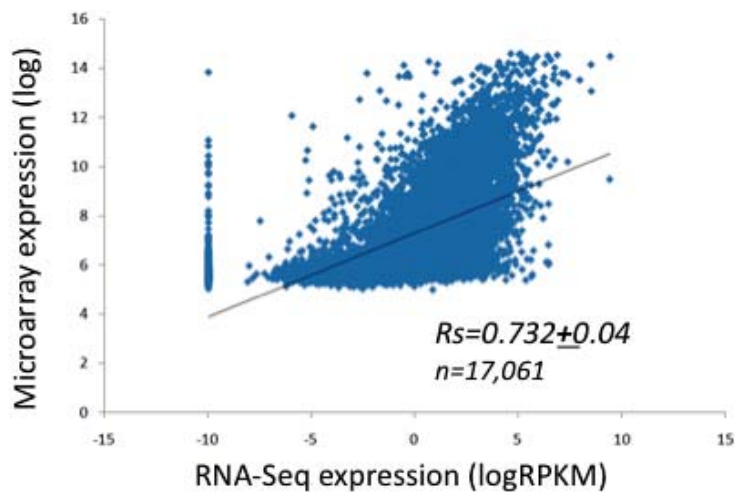

(B)

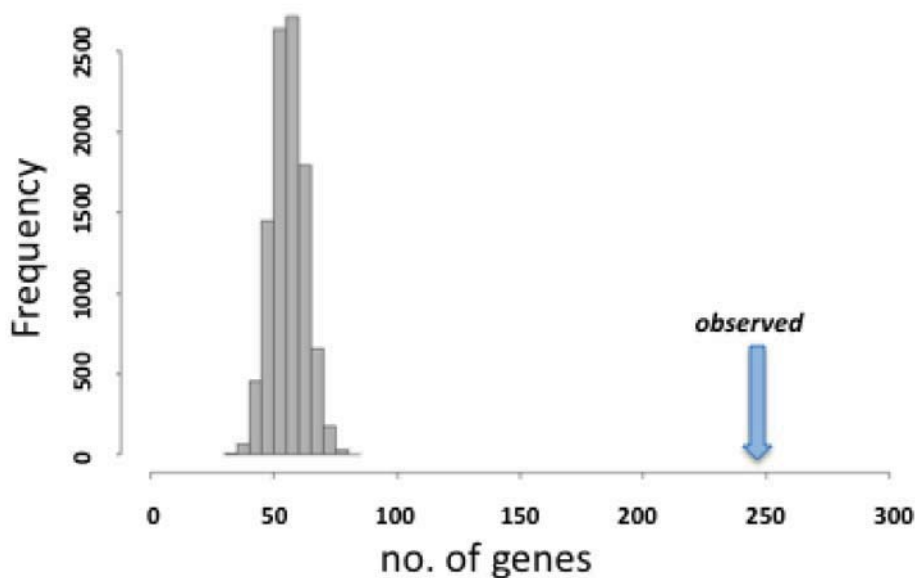

**Supplementary Figure 2. The unsupervised clustering pattern of all the gastric samples.**

The unsupervised analysis was based on 5000 genes with the highest expression level (median expression across 30 samples). Normal samples are shown in gold; gastric tumor samples of stages I-IV are in red, blue, green and purple, respectively.

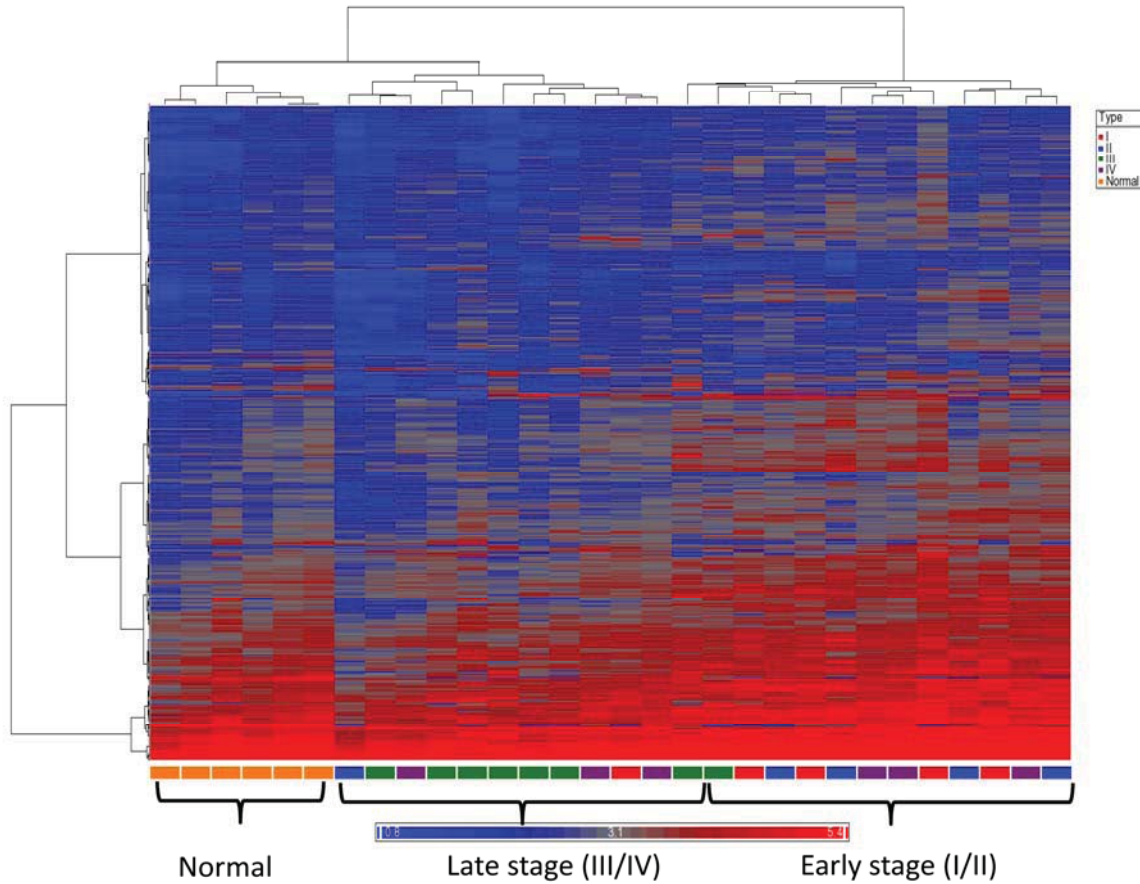

**Supplementary Figure 3. Principal component analysis of different sample groups based on transcriptome-wide gene expression data.**

We used principal component analysis on the expression of 18,890 coding genes to validate the type of tumor samples. Gastric intestinal stromal tumor (GIST) samples are shown in red; gastric tumor samples of stages I-IV are in blue, green, purple and gold, respectively. Image generated with Partek® Genomics Suite™ v 6.5.

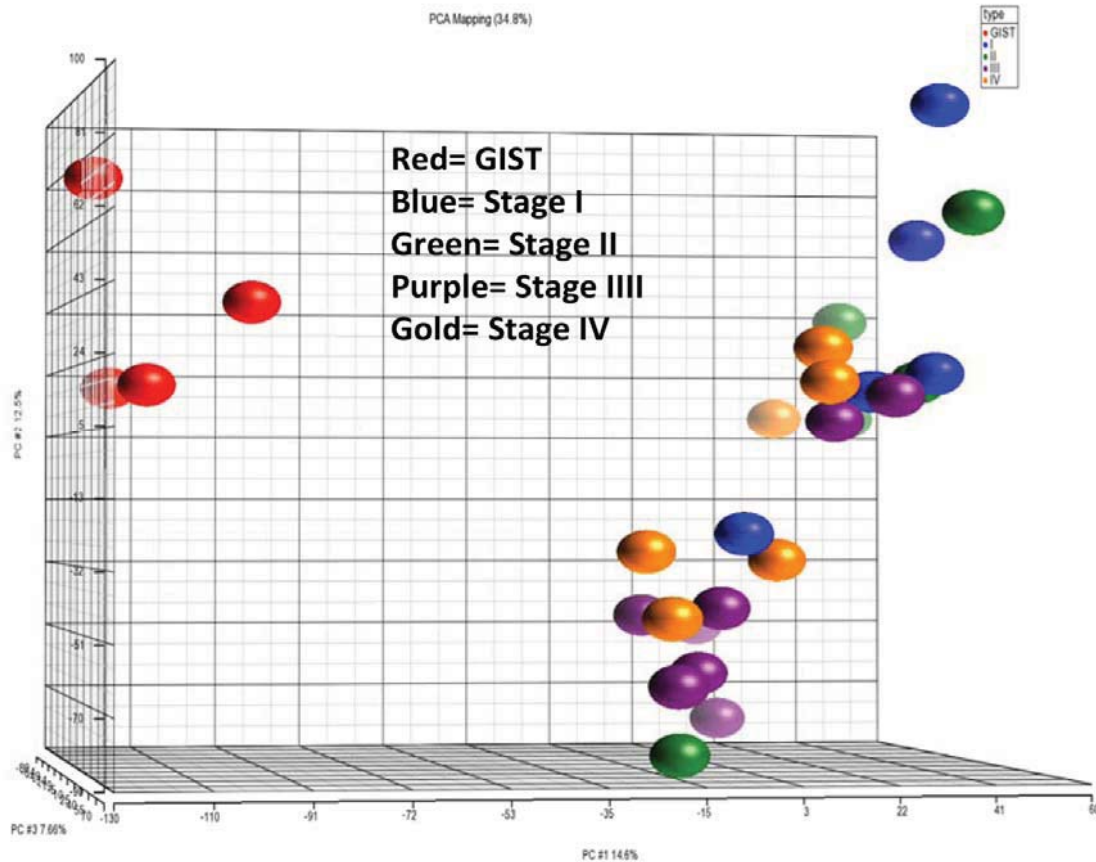

Supplementary Figure 4. Identified 28 genes with significant stage-specific expression change based on the expression data of 24 tumor samples (raw  $P < 7 \times 10^{-4}$ ).

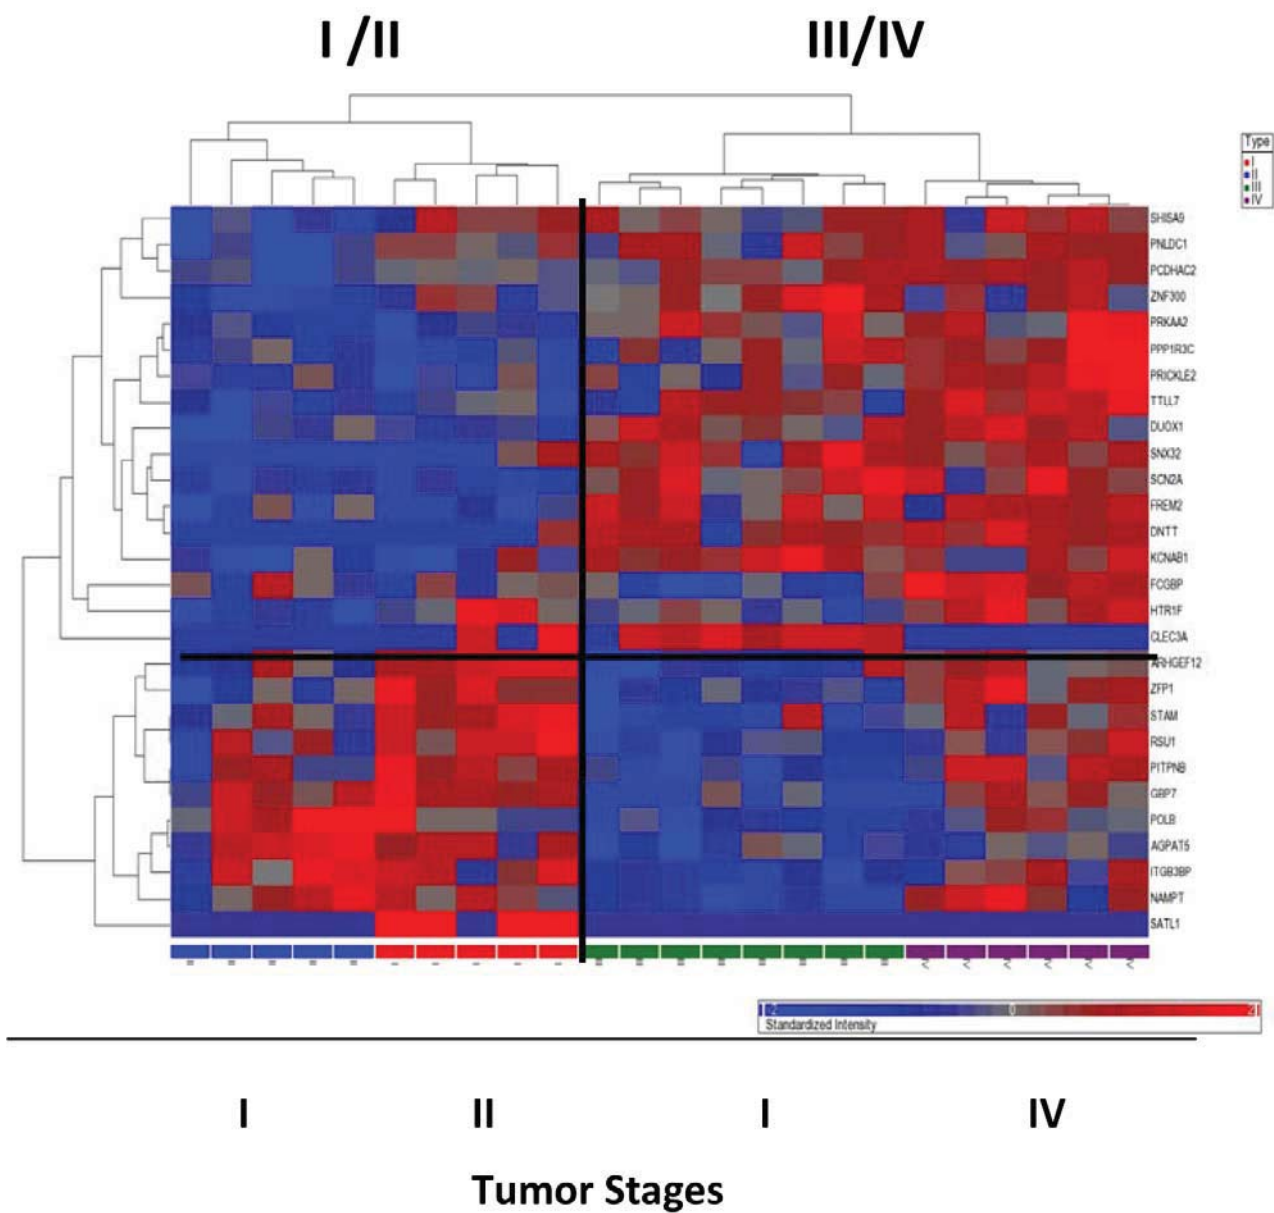

**Supplementary Figure 5. The integrative analysis of three types of transcriptional aberrations related to gastric cancer.**

We used three selection criteria to select key genes for detailed studies. (i) Differentially expressed genes that were identified in both 5-group and 4-stage differential expression analysis; (ii) Target genes of six key differentially expressed miRNAs, the target genes predicted by TargetScan with a significant expression anti-correlation ( $R_s < -0.4$ ,  $P < 0.05$ ); (iii) Genes with recurrent somatic mutations or their interacting partner (IPA annotation). Only two genes were identified by two criteria; and PRKAA2 is the only gene identified by the three criteria simultaneously, thereby being selected for detailed studied.

**Three Criteria**

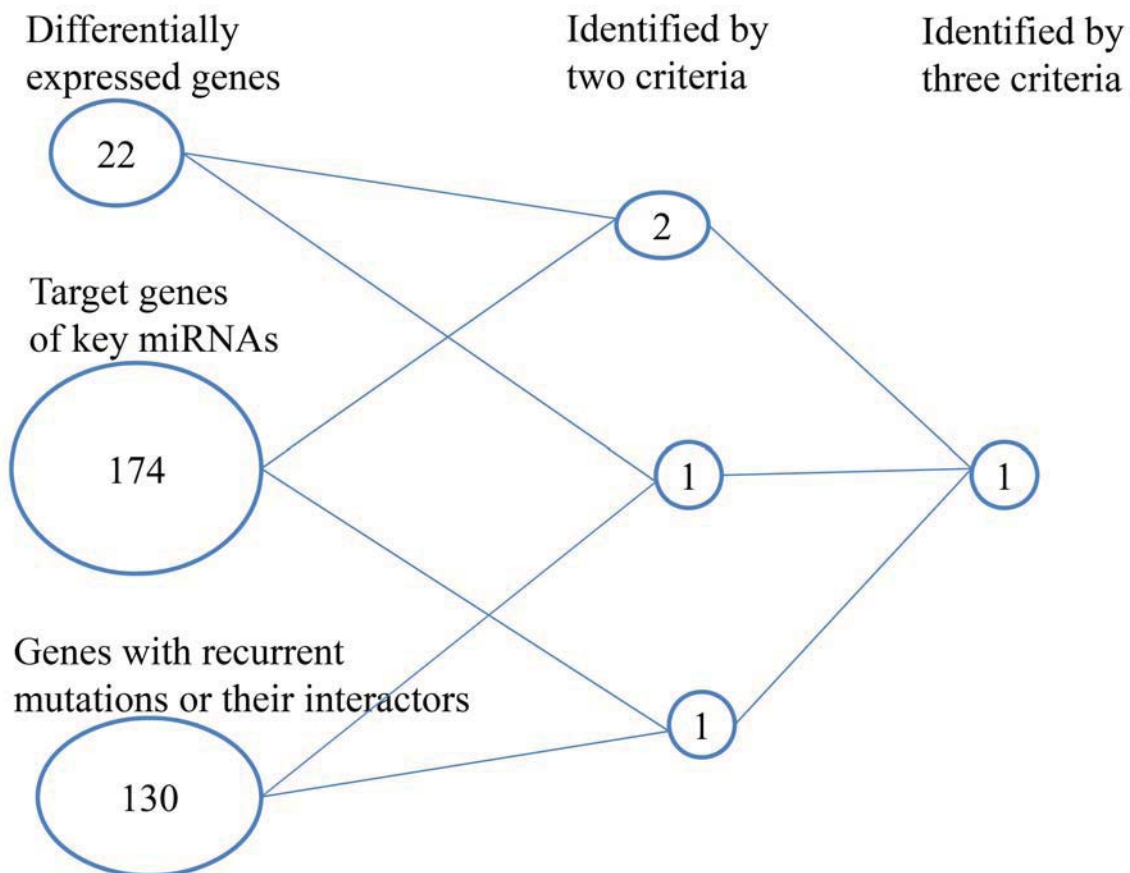

Supplementary Figure 6. The unique expression pattern of *PRKAA2* (AMPK- $\alpha$ -2) among AMPK subunits.

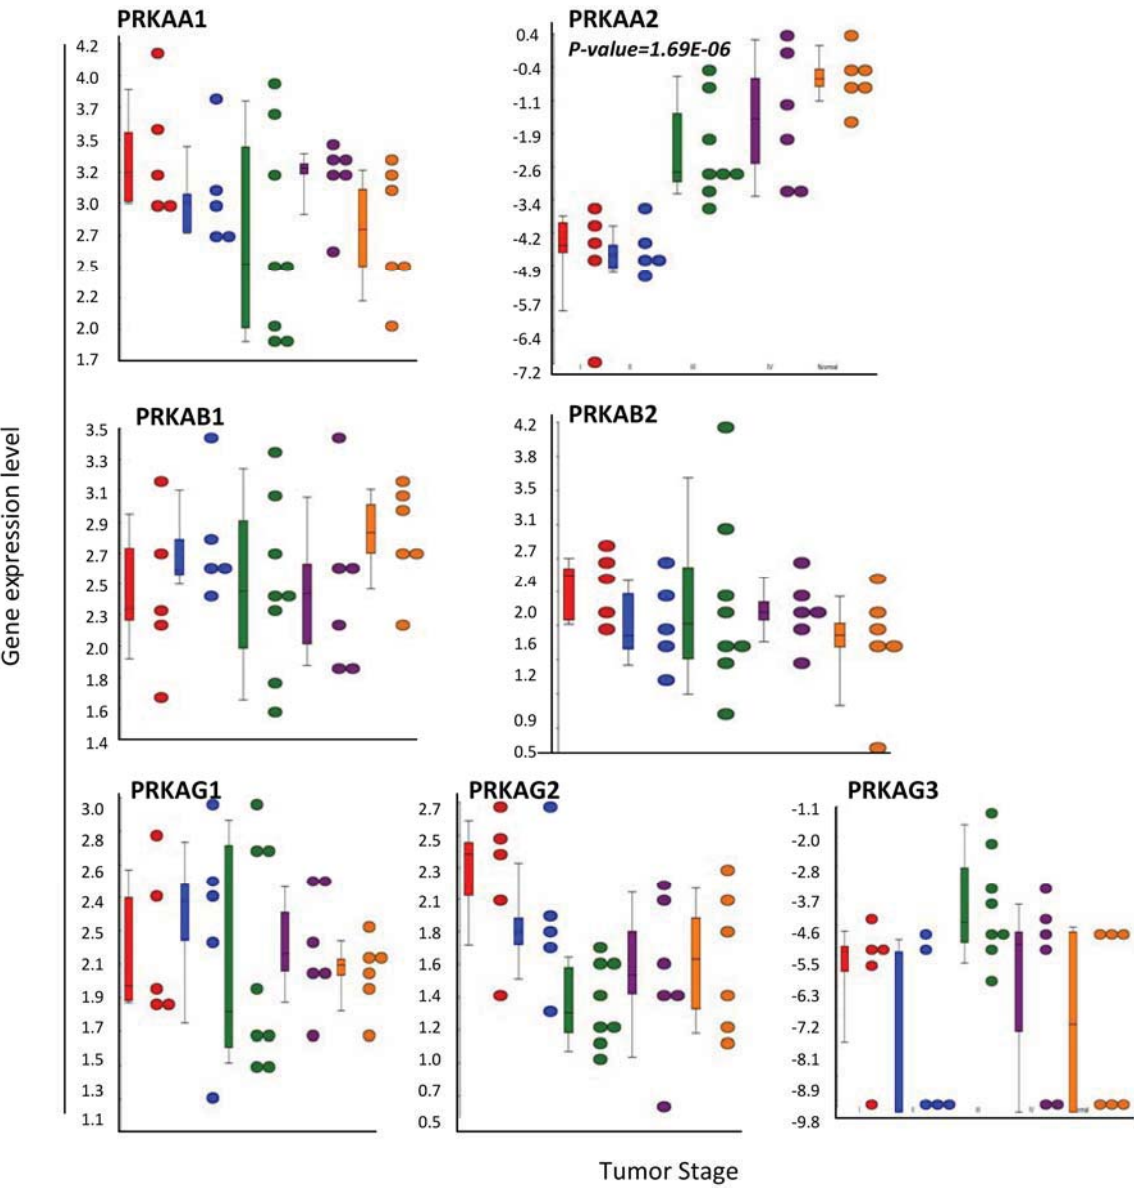

Supplement: NIHMS519213-supplement-2.pdf [file NIHMS519213-supplement-2.pdf]
