# Supplementary material
Source: PubMed Central journal article supplement (PMC3872998)
Supplement: NIHMS519213-supplement-3.pdf [file NIHMS519213-supplement-3.pdf]

**Supplementary Table 1. Clinical characteristics of patients under survey and mapping properties of their WT-seq and small RNA-seq datasets**

| Clinical characteristics |     |         |         |               | WT RNA-Seq             |                                  |                               | Small RNA              |                                   |                     |
|--------------------------|-----|---------|---------|---------------|------------------------|----------------------------------|-------------------------------|------------------------|-----------------------------------|---------------------|
| Case No.                 | Sex | Age     | Stage*  | Histologics** | Total Reads (Millions) | Uniquely Mapped Reads (Millions) | Detected Genes*** (Thousands) | Total Reads (Millions) | Reads mapped to miRNAs (Millions) | Detected miRNAs**** |
| 1                        | M   | 83      | I       | Mixed         | 59.9                   | 16.0                             | 15.2                          | 55.2                   | 5.6                               | 467                 |
| 2                        | M   | 74      | IV      | Diffuse       | 60.0                   | 21.5                             | 15.1                          | 30.4                   | 6.3                               | 429                 |
| 3                        | M   | 63      | III     | Intestine     | 95.9                   | 15.1                             | 15.6                          | 30.5                   | 2.0                               | 447                 |
| 4                        | M   | 58      | III     | Intestine     | 70.7                   | 28.2                             | 15.4                          | NA                     | NA                                | NA                  |
| 5                        | F   | 70      | II      | Diffuse       | 82.7                   | 17.8                             | 15.1                          | 32.8                   | 5.1                               | 453                 |
| 6                        | M   | 64      | IV      | Diffuse       | 81.7                   | 27.0                             | 15.9                          | NA                     | NA                                | NA                  |
| 7                        | M   | 76      | I       | Diffuse       | 53.0                   | 17.7                             | 15.0                          | 24.1                   | 4.6                               | 424                 |
| 8                        | F   | 67      | Normal# | Normal        | 67.1                   | 9.8                              | 15.4                          | 22.4                   | 2.6                               | 435                 |
| 9                        | M   | 61      | I       | Intestine     | 72.1                   | 26.0                             | 15.0                          | 32.8                   | 5.4                               | 468                 |
| 10                       | M   | 69      | Normal  | Normal        | 63.4                   | 11.3                             | 15.5                          | 35.0                   | 6.0                               | 455                 |
| 11                       | M   | 69      | II      | Diffuse       | 74.7                   | 13.4                             | 15.0                          | 30.7                   | 2.7                               | 451                 |
| 12                       | M   | 37      | Normal  | Normal        | 89.5                   | 13.0                             | 15.5                          | 31.1                   | 4.2                               | 454                 |
| 13                       | M   | 56      | Normal  | Normal        | 36.2                   | 7.2                              | 15.2                          | 19.9                   | 3.8                               | 438                 |
| 14                       | F   | 60      | IV      | Mixed         | 64.6                   | 17.5                             | 15.8                          | 39.2                   | 1.4                               | 430                 |
| 15                       | M   | 69      | IV      | Diffuse       | 59.0                   | 10.6                             | 15.5                          | 39.3                   | 6.0                               | 462                 |
| 16                       | M   | 52      | II      | unknown       | 53.2                   | 10.8                             | 15.5                          | 43.9                   | 1.6                               | 431                 |
| 17                       | F   | 32      | Normal  | Normal        | 68.8                   | 10.9                             | 15.6                          | 21.6                   | 5.5                               | 438                 |
| 18                       | F   | 73      | III     | Intestine     | 91.3                   | 17.6                             | 16.5                          | NA                     | NA                                | NA                  |
| 19                       | F   | 66      | I       | Diffuse       | 59.7                   | 14.0                             | 14.8                          | 37.3                   | 4.3                               | 465                 |
| 20                       | M   | 66      | II      | Intestine     | 73.8                   | 25.6                             | 14.8                          | 18.3                   | 2.1                               | 415                 |
| 21                       | M   | 64      | IV      | Diffuse       | 59.0                   | 13.3                             | 15.6                          | NA                     | NA                                | NA                  |
| 22                       | M   | 66      | Normal  | Normal        | 55.7                   | 10.8                             | 16.0                          | 34.5                   | 5.4                               | 435                 |
| 23                       | M   | 52      | III     | Diffuse       | 78.7                   | 31.3                             | 14.9                          | NA                     | NA                                | NA                  |
| 24                       | M   | 47      | III     | Intestine     | 62.6                   | 12.7                             | 14.9                          | 19.3                   | 3.4                               | 390                 |
| 25                       | M   | 61      | III     | Intestine     | 73.7                   | 15.4                             | 14.7                          | 36.0                   | 3.7                               | 418                 |
| 26                       | M   | 64      | I       | Diffuse       | 96.0                   | 26.2                             | 16.4                          | 30.4                   | 7.1                               | 462                 |
| 27                       | M   | 55      | III     | Diffuse       | 80.7                   | 20.8                             | 16.0                          | 182.4                  | 25.4                              | 464                 |
| 28                       | M   | 72      | III     | Diffuse       | 89.3                   | 26.5                             | 17.2                          | 19.7                   | 4.6                               | 421                 |
| 29                       | M   | unknown | IV      | unknown       | 77.4                   | 28.1                             | 15.3                          | 24.5                   | 3.7                               | 456                 |
| 30                       | M   | unknown | II      | unknown       | 73.9                   | 35.8                             | 14.5                          | 19.4                   | 4.1                               | 429                 |

\*AJCC stage; \*\*Lauren's Classification; \*\*\* RPKM > 0.05; \*\*\*\* with mapped read; #Normal samples were collected from patients of different tumor stages; NA = not available.

**Supplementary Table 2. List of differentially expressed genes related to gastric cancer**

**(A) List of 356 differentially expressed coding genes related to gastric cancer**

| Gene Symbol     | Fold Change (I,II,III,IV vs. normal) | P-value (ANOVA) | Biological and Molecular Category    |
|-----------------|--------------------------------------|-----------------|--------------------------------------|
| <i>ABCC12</i>   | -9.13                                | 3.05E-04        | transporter                          |
| <i>ABCC5</i>    | -2.76                                | 1.71E-05        | transporter                          |
| <i>ABHD11</i>   | 4.04                                 | 4.90E-04        | enzyme                               |
| <i>ACAD L</i>   | -23.86                               | 2.28E-05        | enzyme                               |
| <i>ACER2</i>    | -4.84                                | 1.43E-04        | cell adhesion, motility and invasion |
| <i>ADA</i>      | -3.61                                | 9.75E-05        | enzyme                               |
| <i>ADAM28</i>   | -4.25                                | 8.58E-04        | cell adhesion, motility and invasion |
| <i>ADAMTSL1</i> | -4.62                                | 5.43E-05        | cell adhesion, motility and invasion |
| <i>ADAMTSL3</i> | -2.83                                | 7.80E-04        | cell adhesion, motility and invasion |
| <i>ADH7</i>     | -173.66                              | 1.36E-05        | enzyme                               |
| <i>ADHFE1</i>   | -9.01                                | 2.62E-04        | enzyme                               |
| <i>ADRA1A</i>   | -8.71                                | 3.23E-04        | G-protein coupled receptor           |
| <i>AFAP1</i>    | 1.84                                 | 8.68E-04        | cell adhesion, motility and invasion |
| <i>AGPAT5</i>   | 1.60                                 | 8.39E-05        | enzyme                               |
| <i>AGXT2L1</i>  | -123.59                              | 2.85E-04        | enzyme                               |
| <i>ALDH6A1</i>  | -2.99                                | 4.76E-05        | enzyme                               |
| <i>ANGPTL3</i>  | -228.30                              | 6.42E-06        | growth factor                        |
| <i>ANO7</i>     | -8.13                                | 6.40E-07        | transporter                          |
| <i>AP2B1</i>    | 1.60                                 | 8.36E-04        | transporter                          |
| <i>APLP1</i>    | -8.50                                | 7.31E-04        | transcriptional regulation           |
| <i>AQP4</i>     | -166.92                              | 1.39E-05        | transporter                          |
| <i>ARHGAP20</i> | -1.99                                | 2.72E-04        | signal transduction                  |
| <i>ARHGAP28</i> | -3.05                                | 1.86E-04        | signal transduction                  |
| <i>ARHGEF12</i> | 1.34                                 | 5.31E-04        | signal transduction                  |
| <i>ARL4D</i>    | -3.91                                | 4.87E-04        | enzyme                               |
| <i>ASB11</i>    | -337.90                              | 4.60E-06        | transcriptional regulation           |
| <i>ATP13A4</i>  | -8.05                                | 3.97E-05        | transporter                          |
| <i>ATP13A5</i>  | -45.21                               | 3.36E-05        | transporter                          |
| <i>ATP1B3</i>   | 2.41                                 | 7.80E-04        | transporter                          |
| <i>ATP4A</i>    | -408.04                              | 4.94E-06        | transporter                          |
| <i>ATP4B</i>    | -609.78                              | 2.03E-05        | transporter                          |
| <i>ATP8A2</i>   | -7.18                                | 7.90E-06        | transporter                          |
| <i>B3GAT1</i>   | -21.37                               | 3.06E-07        | enzyme                               |
| <i>B4GALNT2</i> | -77.22                               | 8.11E-04        | enzyme                               |
| <i>BMP1</i>     | 2.90                                 | 2.85E-04        | peptidase                            |
| <i>BRE</i>      | 1.41                                 | 7.15E-04        | signal transduction                  |
| <i>C11Orf92</i> | -10.74                               | 8.02E-07        | unknown                              |
| <i>C12orf30</i> | 1.85                                 | 2.19E-04        | unknown                              |
| <i>C16Orf89</i> | -57.61                               | 2.59E-04        | unknown                              |

|                  |         |          |                                      |
|------------------|---------|----------|--------------------------------------|
| <i>C1orf107</i>  | 1.68    | 8.13E-04 | differentiation                      |
| <i>C20Orf194</i> | -1.70   | 2.31E-04 | unknown                              |
| <i>C3Orf18</i>   | -2.26   | 8.88E-04 | unknown                              |
| <i>C3Orf57</i>   | -10.14  | 1.54E-04 | lipid metabolism                     |
| <i>C3Orf59</i>   | -1.10   | 6.89E-04 | unknown                              |
| <i>C5Orf38</i>   | -29.23  | 6.25E-04 | unknown                              |
| <i>C5Orf4</i>    | -3.18   | 6.32E-05 | lipid metabolism                     |
| <i>C6orf108</i>  | 2.13    | 5.41E-04 | metabolism                           |
| <i>C6orf167</i>  | 1.94    | 8.03E-04 | protein binding                      |
| <i>C8orf84</i>   | -10.07  | 7.14E-05 | metabolism                           |
| <i>C9orf3</i>    | 1.78    | 4.31E-04 | peptidase                            |
| <i>CACNA2D2</i>  | -5.34   | 5.99E-05 | ion channel                          |
| <i>CALM2</i>     | 1.53    | 6.69E-04 | binding protein                      |
| <i>CBFB</i>      | 1.70    | 2.91E-04 | transcriptional regulation           |
| <i>CBX3</i>      | 2.57    | 7.27E-04 | transcriptional regulation           |
| <i>CCDC150</i>   | 4.10    | 6.87E-04 | unknown                              |
| <i>CCDC41</i>    | 2.24    | 4.64E-04 | unknown                              |
| <i>CCDC6</i>     | 1.68    | 3.84E-04 | cytoskeleton                         |
| <i>CCDC89</i>    | -3.33   | 3.42E-06 | cytoskeleton                         |
| <i>CCDC93</i>    | 1.63    | 7.62E-04 | unknown                              |
| <i>CCKAR</i>     | -125.68 | 8.48E-04 | G-protein coupled receptor           |
| <i>CCKBR</i>     | -60.34  | 7.84E-04 | G-protein coupled receptor           |
| <i>CD3EAP</i>    | 3.01    | 6.08E-04 | transcriptional regulation           |
| <i>CDC123</i>    | 1.85    | 7.02E-04 | cell cycle                           |
| <i>CDCA7</i>     | 3.28    | 6.17E-04 | cell cycle                           |
| <i>CDK2</i>      | 1.72    | 2.08E-04 | kinase                               |
| <i>CEBPZ</i>     | 1.86    | 2.88E-04 | transcriptional regulation           |
| <i>CELSR3</i>    | 3.05    | 2.18E-04 | G-protein coupled receptor           |
| <i>CGNL1</i>     | -3.30   | 5.63E-04 | cell adhesion, motility and invasion |
| <i>CHD1</i>      | 1.56    | 8.78E-04 | enzyme                               |
| <i>CHEK1</i>     | 2.65    | 7.92E-04 | kinase                               |
| <i>CHGA</i>      | -89.28  | 2.75E-05 | unknown                              |
| <i>CHGB</i>      | -15.62  | 6.74E-05 | unknown                              |
| <i>CHIA</i>      | -302.39 | 5.12E-04 | enzyme                               |
| <i>CKB</i>       | -10.69  | 5.10E-05 | kinase                               |
| <i>CKMT2</i>     | -30.92  | 3.68E-04 | kinase                               |
| <i>CLDN1</i>     | 6.88    | 8.69E-04 | cell adhesion, motility and invasion |
| <i>CLDN15</i>    | 2.65    | 6.68E-04 | cell adhesion, motility and invasion |
| <i>CLDN7</i>     | 5.92    | 2.70E-05 | cell adhesion, motility and invasion |
| <i>CLIC6</i>     | -16.53  | 1.15E-04 | ion channel                          |
| <i>CNFN</i>      | 76.53   | 3.29E-04 | cell cycle                           |
| <i>COL2A1</i>    | -41.18  | 4.93E-04 | cell adhesion, motility and invasion |
| <i>COL4A1</i>    | 3.59    | 4.47E-04 | cell adhesion, motility and invasion |
| <i>COL6A3</i>    | 3.28    | 3.71E-04 | cell adhesion, motility and invasion |

|                 |         |          |                                      |
|-----------------|---------|----------|--------------------------------------|
| <i>CORO1C</i>   | 1.68    | 7.32E-04 | signal transduction                  |
| <i>CPEB3</i>    | -1.75   | 2.78E-04 | unknown                              |
| <i>CTSF</i>     | -3.44   | 1.34E-05 | peptidase                            |
| <i>CWH43</i>    | -133.53 | 1.34E-05 | unknown                              |
| <i>CYB5R1</i>   | -2.24   | 1.44E-06 | enzyme                               |
| <i>DBF4</i>     | 3.23    | 3.31E-04 | kinase                               |
| <i>DCAF13</i>   | 2.20    | 4.57E-04 | protein binding                      |
| <i>DCLRE1B</i>  | 1.98    | 1.21E-04 | cell cycle                           |
| <i>DDX10</i>    | 1.74    | 8.75E-04 | enzyme                               |
| <i>DGKD</i>     | -3.64   | 2.46E-06 | kinase                               |
| <i>DMRTA1</i>   | -10.65  | 4.70E-04 | transcriptional regulation           |
| <i>DNER</i>     | -35.18  | 1.71E-04 | receptor                             |
| <i>DNTT</i>     | 1.49    | 3.06E-04 | enzyme                               |
| <i>DTX3L</i>    | 1.87    | 6.31E-04 | protein binding                      |
| <i>DUOX1</i>    | -8.88   | 7.84E-08 | enzyme                               |
| <i>DUOXA1</i>   | -9.20   | 2.12E-04 | transporter                          |
| <i>DUSP14</i>   | 2.43    | 3.69E-04 | phosphatase                          |
| <i>DUSP19</i>   | -4.05   | 1.40E-05 | phosphatase                          |
| <i>E2F3</i>     | 2.38    | 4.03E-04 | transcriptional regulation           |
| <i>ECHDC3</i>   | -12.93  | 3.41E-04 | enzyme                               |
| <i>EEF1A2</i>   | -21.36  | 3.13E-05 | translation regulator                |
| <i>ELK1</i>     | 1.89    | 5.88E-04 | transcriptional regulation           |
| <i>ELL2</i>     | -2.56   | 1.10E-05 | transcriptional regulation           |
| <i>ENC1</i>     | 2.57    | 1.27E-04 | peptidase                            |
| <i>ENDOD1</i>   | 1.58    | 7.82E-04 | enzyme                               |
| <i>ENPEP</i>    | 2.70    | 9.01E-04 | peptidase                            |
| <i>ENPP5</i>    | -8.94   | 5.64E-04 | enzyme                               |
| <i>EPCAM</i>    | 3.28    | 4.97E-04 | cell adhesion, motility and invasion |
| <i>EPPK1</i>    | 3.66    | 1.72E-04 | protein binding                      |
| <i>ESF1</i>     | 2.35    | 1.73E-04 | transcriptional regulation           |
| <i>ESRRG</i>    | -68.68  | 4.59E-08 | receptor                             |
| <i>ETV7</i>     | 2.46    | 3.30E-04 | transcriptional regulation           |
| <i>EZH2</i>     | 2.51    | 3.98E-05 | transcriptional regulation           |
| <i>FAM20A</i>   | -3.90   | 3.51E-04 | unknown                              |
| <i>FAM46C</i>   | -4.85   | 3.67E-04 | unknown                              |
| <i>FAM72B</i>   | 46.71   | 6.82E-05 | unknown                              |
| <i>FBXL13</i>   | -6.24   | 2.55E-04 | enzyme                               |
| <i>FCGBP</i>    | -11.59  | 4.89E-07 | protein binding                      |
| <i>FGD6</i>     | 2.95    | 3.32E-04 | cell adhesion, motility and invasion |
| <i>FKBP1A</i>   | 1.57    | 7.65E-04 | signal transduction                  |
| <i>FLJ41603</i> | -3.46   | 4.65E-04 | signal transduction                  |
| <i>FOXI2</i>    | 10.84   | 9.36E-04 | transcriptional regulation           |
| <i>FREM2</i>    | -3.08   | 1.15E-04 | cell adhesion, motility and invasion |
| <i>FUT9</i>     | -38.85  | 2.42E-06 | enzyme                               |

|                 |         |          |                            |
|-----------------|---------|----------|----------------------------|
| <i>GALNT1</i>   | 1.83    | 4.46E-04 | enzyme                     |
| <i>GBGT1</i>    | -3.05   | 9.97E-05 | enzyme                     |
| <i>GCNT4</i>    | -12.51  | 8.21E-06 | enzyme                     |
| <i>GHR</i>      | -3.82   | 1.02E-04 | receptor                   |
| <i>GHRL</i>     | -78.41  | 5.68E-06 | growth factor              |
| <i>GIF</i>      | -278.81 | 2.64E-07 | transporter                |
| <i>GKN1</i>     | -150.77 | 8.51E-07 | transporter                |
| <i>GKN2</i>     | -187.09 | 7.65E-04 | unknown                    |
| <i>GLA</i>      | 2.00    | 8.99E-04 | enzyme                     |
| <i>GLUL</i>     | -3.58   | 8.92E-05 | enzyme                     |
| <i>GPER</i>     | -18.74  | 3.23E-04 | G-protein coupled receptor |
| <i>GPN1</i>     | 1.79    | 6.86E-04 | transcriptional regulator  |
| <i>GPR137B</i>  | 2.10    | 7.00E-05 | unknown                    |
| <i>GPR155</i>   | -8.12   | 5.12E-06 | G-protein coupled receptor |
| <i>GPR3</i>     | 27.61   | 1.37E-04 | G-protein coupled receptor |
| <i>GPR44</i>    | -12.26  | 1.13E-04 | G-protein coupled receptor |
| <i>GPR98</i>    | -5.58   | 3.21E-04 | G-protein coupled receptor |
| <i>GPX3</i>     | -4.32   | 5.21E-06 | glutamine metabolism       |
| <i>GRIA4</i>    | -27.50  | 1.19E-04 | ion channel                |
| <i>GTF2F2</i>   | 2.39    | 2.02E-04 | transcriptional regulation |
| <i>GTPBP4</i>   | 1.77    | 9.32E-04 | enzyme                     |
| <i>HAUS2</i>    | 1.81    | 3.60E-04 | cell cycle                 |
| <i>HDC</i>      | -12.38  | 1.17E-06 | enzyme                     |
| <i>HEATR1</i>   | 1.90    | 5.02E-04 | protein binding            |
| <i>HIPK1</i>    | 1.28    | 4.09E-04 | kinase                     |
| <i>HPN</i>      | -11.96  | 6.82E-05 | peptidase                  |
| <i>HRH2</i>     | -9.22   | 7.20E-05 | G-protein coupled receptor |
| <i>HRK</i>      | 10.46   | 7.79E-04 | apoptosis                  |
| <i>HSD17B4</i>  | 1.05    | 8.22E-04 | enzyme                     |
| <i>HSP90AB1</i> | 2.02    | 5.23E-04 | protein binding            |
| <i>IFT57</i>    | 1.35    | 5.35E-04 | apoptosis                  |
| <i>IGJ</i>      | -28.01  | 2.06E-05 | immune response            |
| <i>IL1RAPL1</i> | -3.87   | 7.22E-04 | receptor                   |
| <i>ILDR1</i>    | 5.22    | 2.23E-05 | receptor                   |
| <i>INTS10</i>   | 1.38    | 7.37E-04 | protein binding            |
| <i>ITGB1</i>    | 1.96    | 4.06E-04 | receptor                   |
| <i>ITGB3BP</i>  | 1.65    | 5.12E-04 | apoptosis                  |
| <i>KCNAB1</i>   | -2.84   | 3.77E-05 | ion channel                |
| <i>KCNE2</i>    | -127.79 | 3.32E-04 | ion channel                |
| <i>KCNJ15</i>   | -20.13  | 2.95E-04 | ion channel                |
| <i>KCNJ16</i>   | -92.12  | 4.83E-07 | ion channel                |
| <i>KCNT2</i>    | -2.30   | 7.08E-04 | ion channel                |
| <i>KDM1B</i>    | 2.17    | 9.44E-04 | transcriptional regulation |
| <i>KDSR</i>     | 1.63    | 7.49E-04 | enzyme                     |

|                 |         |          |                                      |
|-----------------|---------|----------|--------------------------------------|
| <i>KIAA2022</i> | -6.51   | 1.09E-04 | nucleic acid metabolism              |
| <i>KLF15</i>    | -9.91   | 2.55E-04 | transcriptional regulation           |
| <i>KLHL3</i>    | -1.90   | 2.48E-04 | protein binding                      |
| <i>KLHL7</i>    | 1.56    | 3.38E-04 | protein binding                      |
| <i>KPNA3</i>    | 1.85    | 5.85E-04 | transporter                          |
| <i>LCLAT1</i>   | 2.31    | 5.41E-05 | enzyme                               |
| <i>LHFPL2</i>   | 1.74    | 7.15E-04 | enzyme                               |
| <i>LIFR</i>     | -6.25   | 1.00E-05 | receptor                             |
| <i>LIMCH1</i>   | -1.76   | 6.21E-04 | cell adhesion, motility and invasion |
| <i>LIPF</i>     | -381.36 | 2.83E-07 | enzyme                               |
| <i>LPGAT1</i>   | 2.32    | 5.75E-04 | lipid metabolism                     |
| <i>LRRCC1</i>   | 1.84    | 8.95E-04 | transporter                          |
| <i>LTF</i>      | -36.60  | 2.14E-06 | peptidase                            |
| <i>LUZP1</i>    | 1.69    | 2.96E-04 | unknown                              |
| <i>LUZP6</i>    | 1.45    | 3.76E-04 | unknown                              |
| <i>MAK16</i>    | 1.99    | 5.74E-04 | unknown                              |
| <i>MAMDC2</i>   | -6.91   | 2.14E-04 | protein binding                      |
| <i>MAPRE1</i>   | 1.70    | 2.04E-04 | cell cycle                           |
| <i>MARVELD3</i> | 4.02    | 5.82E-04 | unknown                              |
| <i>MCM8</i>     | 2.34    | 3.60E-04 | enzyme                               |
| <i>MEST</i>     | 2.99    | 7.62E-04 | peptidase                            |
| <i>METTL7A</i>  | -4.88   | 3.57E-05 | metabolism                           |
| <i>MFSD4</i>    | -19.42  | 3.04E-05 | transporter                          |
| <i>MICALL1</i>  | -2.74   | 1.29E-04 | ion binding                          |
| <i>MIPEP</i>    | 1.71    | 7.15E-04 | peptidase                            |
| <i>MKI67IP</i>  | 2.17    | 2.99E-05 | protein binding                      |
| <i>MOCOS</i>    | 2.35    | 3.09E-05 | enzyme                               |
| <i>MPZL1</i>    | 1.67    | 5.79E-04 | signal transduction                  |
| <i>MTCH2</i>    | 1.90    | 9.22E-04 | transporter                          |
| <i>MTPAP</i>    | 1.59    | 1.26E-05 | transcriptional regulation           |
| <i>MTPN</i>     | 1.45    | 3.76E-04 | transcriptional regulation           |
| <i>MTSS1</i>    | -2.45   | 7.80E-05 | cell adhesion, motility and invasion |
| <i>MYB</i>      | 4.56    | 5.10E-05 | transcriptional regulation           |
| <i>MYRIP</i>    | -19.75  | 8.40E-05 | protein binding                      |
| <i>NAMPT</i>    | 1.75    | 5.45E-04 | cytokine                             |
| <i>NANP</i>     | 2.29    | 3.17E-04 | enzyme                               |
| <i>NAT5</i>     | 2.00    | 7.72E-05 | enzyme                               |
| <i>NCAM1</i>    | -6.08   | 4.54E-04 | cell adhesion, motility and invasion |
| <i>NEDD4</i>    | 1.56    | 5.21E-04 | enzyme                               |
| <i>NFE2L3</i>   | 3.56    | 5.25E-05 | transcriptional regulation           |
| <i>NOD1</i>     | 2.06    | 7.50E-04 | apoptosis                            |
| <i>NOP58</i>    | 1.89    | 6.69E-04 | enzyme                               |
| <i>NR6A1</i>    | 34.26   | 3.90E-04 | ligand-dependent nuclear receptor    |
| <i>NTN4</i>     | -2.57   | 3.73E-04 | protein binding                      |

|                 |         |          |                                      |
|-----------------|---------|----------|--------------------------------------|
| <i>OXCT1</i>    | -2.68   | 4.15E-04 | enzyme                               |
| <i>PALB2</i>    | 1.97    | 1.38E-04 | protein binding                      |
| <i>PARP14</i>   | 2.24    | 4.61E-04 | transcriptional regulation           |
| <i>PAWR</i>     | 1.94    | 7.62E-04 | transcriptional regulation           |
| <i>PAXIP1</i>   | 1.81    | 6.89E-04 | genome stability                     |
| <i>PCDH7</i>    | -2.53   | 6.53E-05 | cell adhesion, motility and invasion |
| <i>PCDHAC2</i>  | -2.33   | 4.44E-04 | cell adhesion, motility and invasion |
| <i>PDILT</i>    | -214.19 | 1.33E-04 | differentiation                      |
| <i>PGA3</i>     | -339.60 | 3.13E-07 | peptidase                            |
| <i>PGA5</i>     | -593.80 | 8.06E-07 | peptidase                            |
| <i>PGC</i>      | -165.06 | 1.81E-07 | peptidase                            |
| <i>PGM2</i>     | 1.86    | 3.65E-04 | enzyme                               |
| <i>PGM2L1</i>   | 2.82    | 3.67E-04 | enzyme                               |
| <i>PHLDB2</i>   | -1.42   | 7.53E-04 | unknown                              |
| <i>PICALM</i>   | 1.47    | 6.25E-04 | transcriptional regulation           |
| <i>PINX1</i>    | 1.68    | 4.01E-04 | protein binding                      |
| <i>PITPNB</i>   | 1.61    | 7.59E-06 | transporter                          |
| <i>PKDCC</i>    | 5.54    | 2.84E-06 | kinase                               |
| <i>PKHD1L1</i>  | -6.11   | 2.75E-04 | receptor                             |
| <i>PKNOX2</i>   | -4.44   | 8.17E-04 | transcriptional regulation           |
| <i>PL-5283</i>  | 1.62    | 9.65E-05 | unknown                              |
| <i>PLCXD3</i>   | -18.42  | 1.71E-04 | lipid metabolism                     |
| <i>PLEKHA1</i>  | 2.09    | 2.24E-04 | protein binding                      |
| <i>PLEKHG1</i>  | 2.19    | 8.05E-05 | signal transduction                  |
| <i>PLSCR1</i>   | 2.06    | 8.79E-04 | enzyme                               |
| <i>PNO1</i>     | 2.12    | 2.77E-04 | unknown                              |
| <i>PNPLA7</i>   | -4.38   | 7.77E-05 | enzyme                               |
| <i>POLB</i>     | 1.54    | 4.64E-05 | enzyme                               |
| <i>POLR1C</i>   | 2.14    | 1.44E-04 | enzyme                               |
| <i>PPA1</i>     | 2.51    | 1.51E-04 | enzyme                               |
| <i>PPP1R3C</i>  | -4.75   | 1.52E-06 | phosphatase                          |
| <i>PRDM5</i>    | -2.43   | 7.33E-04 | protein binding                      |
| <i>PRICKLE2</i> | -1.48   | 5.93E-05 | ion binding                          |
| <i>PRKAA2</i>   | -6.71   | 4.65E-06 | kinase                               |
| <i>PRKD1</i>    | -1.36   | 7.28E-04 | kinase                               |
| <i>PRKDC</i>    | 2.16    | 1.46E-04 | kinase                               |
| <i>PRSS22</i>   | 3.50    | 8.66E-04 | peptidase                            |
| <i>PSAPL1</i>   | -38.39  | 1.48E-04 | lipid metabolism                     |
| <i>PSCA</i>     | -69.71  | 1.84E-06 | unknown                              |
| <i>PTGER3</i>   | -6.07   | 5.87E-05 | G-protein coupled receptor           |
| <i>PTPN12</i>   | 2.25    | 2.79E-04 | phosphatase                          |
| <i>PTPRS</i>    | -3.05   | 8.34E-04 | phosphatase                          |
| <i>PUS7</i>     | 2.78    | 9.28E-06 | unknown                              |
| <i>PVRL1</i>    | 2.83    | 7.51E-04 | cell adhesion, motility and invasion |

|                 |         |          |                                      |
|-----------------|---------|----------|--------------------------------------|
| <i>QTRTD1</i>   | 1.80    | 3.44E-04 | unknown                              |
| <i>RAB6B</i>    | -2.27   | 6.45E-04 | enzyme                               |
| <i>RAI14</i>    | 2.30    | 3.58E-04 | transcriptional regulation           |
| <i>RAP2A</i>    | 2.24    | 4.71E-05 | enzyme                               |
| <i>RASAL2</i>   | 2.56    | 1.18E-04 | signal transduction                  |
| <i>RBBP9</i>    | 2.01    | 8.27E-04 | cell cycle                           |
| <i>RBL1</i>     | 1.98    | 3.89E-05 | cell cycle                           |
| <i>RBPM52</i>   | -3.56   | 1.62E-04 | unknown                              |
| <i>RCN1</i>     | 3.19    | 3.21E-04 | unknown                              |
| <i>RELL1</i>    | -1.97   | 7.24E-04 | unknown                              |
| <i>REP15</i>    | -10.79  | 1.17E-05 | unknown                              |
| <i>RGPD2</i>    | 13.66   | 4.32E-04 | unknown                              |
| <i>RHEB</i>     | 1.65    | 6.66E-05 | enzyme                               |
| <i>RICH2</i>    | 1.18    | 4.85E-04 | unknown                              |
| <i>RNASE1</i>   | -4.37   | 2.58E-04 | enzyme                               |
| <i>RNF148</i>   | 2.99    | 9.51E-04 | enzyme                               |
| <i>RPF2</i>     | 2.57    | 2.94E-04 | protein binding                      |
| <i>RSU1</i>     | 1.45    | 1.94E-04 | signal transduction                  |
| <i>RTKN2</i>    | 3.55    | 5.00E-05 | signal transduction                  |
| <i>SCGN</i>     | -20.60  | 1.94E-04 | unknown                              |
| <i>SCN2A</i>    | -1.81   | 1.36E-05 | ion channel                          |
| <i>SCN3A</i>    | -4.62   | 8.81E-04 | ion channel                          |
| <i>SCNN1G</i>   | -29.91  | 6.49E-04 | ion channel                          |
| <i>SCUBE2</i>   | -5.93   | 5.41E-04 | unknown                              |
| <i>SELI</i>     | 1.76    | 2.35E-04 | unknown                              |
| <i>SERPINA4</i> | -16.50  | 8.72E-06 | cell adhesion, motility and invasion |
| <i>SFRS13A</i>  | 1.54    | 6.22E-04 | binding                              |
| <i>SH3GL2</i>   | -105.09 | 2.44E-05 | enzyme                               |
| <i>SIGLEC11</i> | -12.17  | 6.76E-04 | cell adhesion, motility and invasion |
| <i>SLC16A7</i>  | -7.52   | 3.15E-06 | transporter                          |
| <i>SLC1A2</i>   | -15.27  | 1.40E-06 | transporter                          |
| <i>SLC26A5</i>  | -9.18   | 4.94E-05 | transporter                          |
| <i>SLC26A7</i>  | -14.88  | 1.23E-04 | transporter                          |
| <i>SLC26A9</i>  | -17.90  | 7.27E-06 | transporter                          |
| <i>SLC28A2</i>  | -41.28  | 1.23E-04 | transporter                          |
| <i>SLC5A5</i>   | -123.80 | 2.19E-04 | transporter                          |
| <i>SLC7A2</i>   | -1.81   | 3.15E-04 | transporter                          |
| <i>SLC9A4</i>   | -54.65  | 3.36E-06 | transporter                          |
| <i>SMC6</i>     | 1.78    | 2.94E-04 | DNA repair                           |
| <i>SMG1</i>     | 1.58    | 9.28E-04 | kinase                               |
| <i>SNX32</i>    | 4.89    | 2.57E-04 | protein binding                      |
| <i>SNX5</i>     | 1.65    | 1.78E-05 | transporter                          |
| <i>SOX2</i>     | -14.51  | 4.92E-04 | transcriptional regulation           |
| <i>SPINK2</i>   | -188.53 | 2.73E-06 | unknown                              |



|                  |         |          |                                      |
|------------------|---------|----------|--------------------------------------|
| <i>SRD5A1</i>    | 2.24    | 2.27E-04 | enzyme                               |
| <i>SRPK1</i>     | 2.30    | 1.26E-04 | kinase                               |
| <i>SST</i>       | -450.60 | 4.79E-05 | signal transduction                  |
| <i>STAM</i>      | 1.04    | 6.12E-04 | signal transduction                  |
| <i>STX12</i>     | -1.71   | 1.36E-04 | transporter                          |
| <i>STX6</i>      | 1.72    | 1.45E-04 | transporter                          |
| <i>SUGT1</i>     | 1.66    | 8.62E-04 | cell cycle                           |
| <i>SULT2A1</i>   | -144.17 | 2.50E-04 | enzyme                               |
| <i>SVIL</i>      | 2.26    | 7.12E-04 | cell adhesion, motility and invasion |
| <i>T PR</i>      | 1.95    | 7.71E-04 | protein binding                      |
| <i>TASP1</i>     | -1.51   | 1.41E-04 | peptidase                            |
| <i>TBC1D14</i>   | -1.82   | 2.90E-04 | signal transduction                  |
| <i>TBC1D9</i>    | -21.85  | 4.77E-04 | signal transduction                  |
| <i>TFF1</i>      | -33.54  | 8.84E-04 | growth factor                        |
| <i>TFF2</i>      | 1.70    | 8.73E-04 | growth factor                        |
| <i>TH1L</i>      | 3.36    | 5.00E-05 | transcriptional regulation           |
| <i>THY1</i>      | -10.23  | 1.40E-05 | angiogenesis                         |
| <i>TMED6</i>     | 1.82    | 4.22E-04 | transporter                          |
| <i>TMEM202</i>   | -2.62   | 2.68E-04 | unknown                              |
| <i>TMEM37</i>    | 2.24    | 6.02E-04 | ion channel                          |
| <i>TNFRSF10A</i> | -5.64   | 6.63E-05 | receptor                             |
| <i>TPD52L1</i>   | 1.94    | 7.13E-04 | apoptosis                            |
| <i>TPK1</i>      | 1.75    | 9.07E-04 | kinase                               |
| <i>TRIM15</i>    | 4.63    | 4.44E-04 | protein binding                      |
| <i>TRIM37</i>    | 1.65    | 4.05E-04 | unknown                              |
| <i>TRIM50</i>    | -126.48 | 8.18E-04 | protein binding                      |
| <i>TRMT6</i>     | 2.06    | 1.00E-04 | transcriptional regulation           |
| <i>TSC22D3</i>   | -2.65   | 8.66E-04 | transcriptional regulation           |
| <i>TTF2</i>      | 1.96    | 2.04E-04 | transcriptional regulation           |
| <i>TTLL7</i>     | -2.41   | 1.30E-04 | differentiation                      |
| <i>TTR</i>       | -26.58  | 2.93E-04 | transporter                          |
| <i>TUBB6</i>     | 1.82    | 5.96E-04 | cell adhesion, motility and invasion |
| <i>UACA</i>      | 2.03    | 4.39E-04 | apoptosis                            |
| <i>UBE2D1</i>    | 1.89    | 6.25E-05 | enzyme                               |
| <i>UMPS</i>      | 1.79    | 9.42E-04 | enzyme                               |
| <i>USP31</i>     | 2.04    | 3.50E-05 | peptidase                            |
| <i>VSIG2</i>     | -11.40  | 1.61E-04 | unknown                              |
| <i>WASF3</i>     | -3.57   | 3.31E-04 | protein binding                      |
| <i>WDR43</i>     | 2.07    | 1.92E-05 | unknown                              |
| <i>WIPF3</i>     | -5.20   | 1.07E-04 | differentiation                      |
| <i>XRN2</i>      | 1.77    | 3.24E-04 | enzyme                               |
| <i>XYLT2</i>     | -4.02   | 4.44E-07 | enzyme                               |
| <i>YEATS2</i>    | 1.86    | 5.47E-04 | transcriptional regulation           |
| <i>YME1L1</i>    | 1.49    | 4.07E-04 | peptidase                            |

|                |       |          |                            |
|----------------|-------|----------|----------------------------|
| <i>ZFP1</i>    | 1.21  | 6.82E-04 | transcriptional regulation |
| <i>ZNF280C</i> | 2.01  | 2.11E-04 | transcriptional regulation |
| <i>ZNF300</i>  | 1.06  | 3.29E-04 | transcriptional regulation |
| <i>ZNF343</i>  | 1.67  | 4.53E-04 | transcriptional regulation |
| <i>ZNF385B</i> | -9.48 | 1.95E-04 | unknown                    |
| <i>ZNF536</i>  | -8.33 | 6.89E-04 | transcriptional regulation |
| <i>ZNF662</i>  | -2.66 | 9.39E-04 | transcriptional regulation |
| <i>ZNHIT6</i>  | 1.75  | 4.34E-04 | protein binding            |
| <i>ZNRF2</i>   | 1.59  | 3.16E-04 | unknown                    |

**(B) List of 7 differentially expressed long non-coding genes related to gastric cancer**

| <b>Gene<br/>Symbol</b> | <b>Fold Change<br/>(I, II,III,IV vs. normal)</b> | <b>P-value<br/>(ANOVA)</b> |
|------------------------|--------------------------------------------------|----------------------------|
| FLJ42875               | -5.77551                                         | 2.03E-06                   |
| LOC148709              | -2.72475                                         | 8.22E-06                   |
| LOC400043              | -5.8389                                          | 9.37E-06                   |
| LOC150622              | 6.29063                                          | 1.76E-05                   |
| PWRN1                  | 3.84196                                          | 8.39E-05                   |
| LOC286002              | 2.47868                                          | 9.89E-05                   |
| MIR614(hairpin)        | -1.08061                                         | 1.41E-04                   |

**Supplementary Table 3. List of recurrent somatic mutation candidates in gastric cancer.**

| Chromosome | Position  | Gene    | Reference allele | Mutant allele | Mutation type         |
|------------|-----------|---------|------------------|---------------|-----------------------|
| chr1       | 899383    | KLHL17  | C                | T             | NON_SYNONYMOUS_CODING |
| chr12      | 25398284  | KRAS    | C                | T             | NON_SYNONYMOUS_CODING |
| chr14      | 102900821 | TECPR2  | T                | C             | NON_SYNONYMOUS_CODING |
| chr16      | 66976553  | CES2    | T                | C             | NON_SYNONYMOUS_CODING |
| chr17      | 7578406   | TP53    | C                | T             | NON_SYNONYMOUS_CODING |
| chr17      | 7578406   | TP53    | C                | T             | NON_SYNONYMOUS_CODING |
| chr17      | 4713000   | PLD2    | G                | A             | NON_SYNONYMOUS_CODING |
| chr17      | 7577548   | TP53    | C                | T             | NON_SYNONYMOUS_CODING |
| chr17      | 7577539   | TP53    | G                | A             | NON_SYNONYMOUS_CODING |
| chr20      | 3028405   | MRPS26  | C                | T             | STOP_GAINED           |
| chr3       | 172115078 | FNDC3B  | G                | A             | NON_SYNONYMOUS_CODING |
| chr3       | 45817323  | SLC6A20 | G                | A             | NON_SYNONYMOUS_CODING |
| chr6       | 33287277  | DAXX    | A                | G             | NON_SYNONYMOUS_CODING |
| chr9       | 118997676 | PAPPA   | A                | G             | NON_SYNONYMOUS_CODING |

**Supplementary Table 4. List of recurrent somatic mutation candidates in the COSMIC database.**

| Chromosome | Position  | Gene     | Reference allele | Mutant allele | Mutation type |
|------------|-----------|----------|------------------|---------------|---------------|
| chr12      | 9230420   | A2M      | T                | G             | Missense      |
| chr17      | 79104885  | AATK     | T                | C             | Missense      |
| chr17      | 76198669  | AFMID    | G                | A             | Missense      |
| chr11      | 62294430  | AHNAK    | T                | C             | Missense      |
| chr2       | 97817670  | ANKRD36  | A                | G             | Missense      |
| chr11      | 108159732 | ATM      | C                | T             | Missense      |
| chr1       | 169080710 | ATP1B1   | C                | T             | Missense      |
| chr11      | 102248328 | BIRC2    | A                | G             | Missense      |
| chr7       | 140481393 | BRAF     | T                | G             | Missense      |
| chr6       | 121638666 | C6orf170 | G                | A             | Missense      |
| chr1       | 1650797   | CDC2L2   | A                | G             | Missense      |
| chr8       | 95158276  | CDH17    | G                | A             | Missense      |
| chr16      | 55907868  | CES5A    | A                | G             | Missense      |
| chr20      | 40084604  | CHD6     | T                | C             | Missense      |
| chr13      | 111156500 | COL4A2   | C                | T             | Missense      |
| chr19      | 1979811   | CSNK1G2  | A                | G             | Missense      |
| chr6       | 348155    | DUSP22   | G                | A             | Missense      |
| chr6       | 127635972 | ECHDC1   | T                | A             | Missense      |
| chr17      | 37881332  | ERBB2    | G                | A             | Missense      |
| chr1       | 46871457  | FAAH     | A                | G             | Missense      |
| chr4       | 126408710 | FAT4     | A                | G             | Missense      |
| chr6       | 146125581 | FBXO30   | C                | T             | Missense      |
| chr5       | 180057711 | FLT4     | G                | A             | Nonsense      |
| chr6       | 41557797  | FOXP4    | G                | A             | Missense      |
| chr19      | 18497024  | GDF15    | G                | C             | Missense      |
| chr16      | 74499607  | GLG1     | G                | C             | Nonsense      |
| chr3       | 37370579  | GOLGA4   | C                | T             | Missense      |
| chr13      | 94680032  | GPC6     | G                | T             | Missense      |
| chr7       | 126173251 | GRM8     | G                | A             | Missense      |
| chr4       | 89314721  | HERC6    | C                | T             | Missense      |
| chr21      | 38309619  | HLCS     | C                | A             | Missense      |
| chr15      | 77771649  | HMG20A   | G                | A             | Missense      |
| chr5       | 35874575  | IL7R     | C                | T             | Missense      |
| chr1       | 145536012 | ITGA10   | G                | A             | Missense      |
| chr14      | 105615648 | JAG2     | C                | T             | Missense      |
| chr4       | 55599321  | KIT      | A                | T             | Missense      |
| chr12      | 25398284  | KRAS     | C                | T             | Missense      |
| chr12      | 25378561  | KRAS     | G                | A             | Missense      |
| chr1       | 27684715  | MAP3K6   | G                | T             | Missense      |
| chr17      | 19285381  | MAPK7    | C                | T             | Missense      |
| chr5       | 179707528 | MAPK9    | T                | C             | Missense      |
| chr7       | 116340262 | MET      | A                | G             | Missense      |
| chr16      | 58079165  | MMP15    | G                | A             | Missense      |
| chr22      | 31330769  | MORC2    | G                | A             | Missense      |
| chr7       | 100608884 | MUC3B    | G                | A             | Missense      |
| chr11      | 1017069   | MUC6     | G                | A             | Missense      |
| chr16      | 88724353  | MVD      | G                | A             | Nonsense      |
| chr1       | 198201732 | NEK7     | A                | C             | Missense      |
| chr16      | 47117173  | NETO2    | G                | A             | Nonsense      |

|       |           |         |   |   |          |
|-------|-----------|---------|---|---|----------|
| chr9  | 139399321 | NOTCH1  | G | T | Missense |
| chr1  | 120611964 | NOTCH2  | G | C | Missense |
| chr1  | 26303245  | PAFAH2  | C | T | Missense |
| chr14 | 24572812  | PCK2    | G | A | Missense |
| chr7  | 11076699  | PHF14   | T | C | Missense |
| chr4  | 527677    | PIGG    | T | C | Missense |
| chr19 | 282754    | PPAP2C  | C | T | Missense |
| chr22 | 22899234  | PRAME   | A | G | Missense |
| chr20 | 62191410  | PRIC285 | T | C | Missense |
| chr7  | 142460335 | PRSS1   | A | G | Missense |
| chr2  | 113950108 | PSD4    | C | T | Missense |
| chr11 | 244115    | PSMD13  | G | A | Missense |
| chr9  | 98239899  | PTCH1   | G | A | Missense |
| chr4  | 87690998  | PTPN13  | A | G | Missense |
| chr7  | 157874041 | PTPRN2  | C | T | Missense |
| chr2  | 1668790   | PXDN    | C | T | Missense |
| chr12 | 48142680  | RAPGEF3 | T | C | Missense |
| chr5  | 86668002  | RASA1   | G | A | Missense |
| chr21 | 36206763  | RUNX1   | C | T | Missense |
| chr6  | 166739646 | SFT2D1  | T | C | Missense |
| chr20 | 61596965  | SLC17A9 | A | G | Missense |
| chr17 | 18220202  | SMCR8   | A | G | Missense |
| chr17 | 1684605   | SMYD4   | G | T | Missense |
| chr2  | 220356957 | SPEG    | C | T | Nonsense |
| chr17 | 4391169   | SPNS3   | G | A | Missense |
| chr17 | 27011891  | SUPT6H  | A | G | Missense |
| chr6  | 152665261 | SYNE1   | C | A | Missense |
| chr12 | 11150054  | TAS2R20 | C | T | Missense |
| chr3  | 30732970  | TGFBR2  | G | A | Missense |
| chr6  | 138196841 | TNFAIP3 | G | A | Nonsense |
| chr7  | 47317781  | TNS3    | T | C | Missense |
| chr17 | 7579882   | TP53    | C | G | Missense |
| chr17 | 7578406   | TP53    | C | T | Missense |
| chr17 | 7577548   | TP53    | C | T | Missense |
| chr17 | 7577124   | TP53    | C | T | Missense |
| chr17 | 7577539   | TP53    | G | A | Missense |
| chr17 | 7578271   | TP53    | T | A | Missense |
| chr17 | 7577120   | TP53    | C | T | Missense |
| chr15 | 43720335  | TP53BP1 | G | A | Missense |
| chr15 | 74743861  | UBL7    | C | T | Missense |
| chr16 | 88665106  | ZC3H18  | C | T | Missense |
| chr5  | 833915    | ZDHC11  | G | T | Missense |
| chr19 | 57328017  | ZIM2    | C | T | Missense |

**Supplementary Table 5. List of differentially expressed miRNAs related to gastric cancer**

| miRNA           | P-Value  | Fold Change |
|-----------------|----------|-------------|
| hsa-miR-551b    | 2.91E-06 | -6.0        |
| hsa-miR-204     | 1.01E-05 | -21.4       |
| hsa-miR-196b    | 4.05E-05 | 41.4        |
| *hsa-miR-29c    | 9.15E-05 | -3.9        |
| hsa-miR-628-5p  | 1.15E-04 | -1.8        |
| hsa-miR-193b    | 1.82E-04 | -2.8        |
| hsa-miR-196a    | 2.14E-04 | 7.6         |
| *hsa-miR-135b   | 3.31E-04 | 11.4        |
| hsa-miR-548d-3p | 8.49E-04 | 14.6        |
| *hsa-miR-21     | 1.28E-03 | 1.7         |
| hsa-miR-195     | 1.49E-03 | -2.7        |
| hsa-miR-145     | 2.14E-03 | -1.7        |
| hsa-miR-490     | 2.35E-03 | -51.5       |
| *hsa-miR-29b    | 2.52E-03 | -2.1        |
| *hsa-miR-93     | 2.59E-03 | 1.9         |
| hsa-miR-1226    | 3.66E-03 | 2.1         |
| hsa-miR-129-3p  | 3.92E-03 | -10.0       |
| hsa-miR-874     | 4.02E-03 | -3.5        |
| *hsa-miR-135a   | 5.42E-03 | -4.6        |
| hsa-miR-1       | 6.13E-03 | -3.2        |
| hsa-miR-193a-3p | 7.46E-03 | -2.1        |
| hsa-miR-1973    | 8.78E-03 | 42.6        |
| hsa-miR-20b     | 9.06E-03 | -3.8        |
| hsa-miR-140-3p  | 9.08E-03 | -2.0        |
| hsa-miR-1271    | 1.01E-02 | -2.0        |
| *hsa-miR-19a    | 1.08E-02 | 2.7         |

\* Seven miRNAs identified in the present study of Asian gastric tumors consistent with the findings of Ueda et al. (2010) based on Japanese gastric tumors.
